# Supplementary material for: Solar denitrification coupled with in situ water splitting
Source: Royal Society of Chemistry journal article supplement (doi:10.1039/d1ee01342d), 2021-01-01
Supplement: d1ee01342d1.pdf [file d1ee01342d1.pdf]

## **Electronic Supplementary Information**

### **Solar denitrification coupled with *in situ* water splitting**

*Shinbi Lee,<sup>†</sup> Suhyeon Kim,<sup>‡</sup> Cheolwoo Park,<sup>§,||</sup> Wooyul Kim,<sup>§</sup> Sunmin Ryu,<sup>‡</sup> and Wonyong Choi<sup>\*,†</sup>*

<sup>†</sup>Division of Environmental Science and Engineering, Pohang University of Science and Technology (POSTECH), Pohang 37673, Korea

<sup>‡</sup>Department of Chemistry, Pohang University of Science and Technology (POSTECH), Pohang 37673, Korea

<sup>§</sup>Department of Chemical and Biological Engineering, College of Engineering, Sookmyung Women's University, Seoul 04310, Korea

<sup>||</sup> Department of Energy Science, Sungkyunkwan University, Suwon 16419, Korea

\*Corresponding author. E-mail: [wchoi@postech.edu](mailto:wchoi@postech.edu) ; phone: +82-54-279-2283 (W.C.)

Number of Pages : 10

Number of Figures : 9

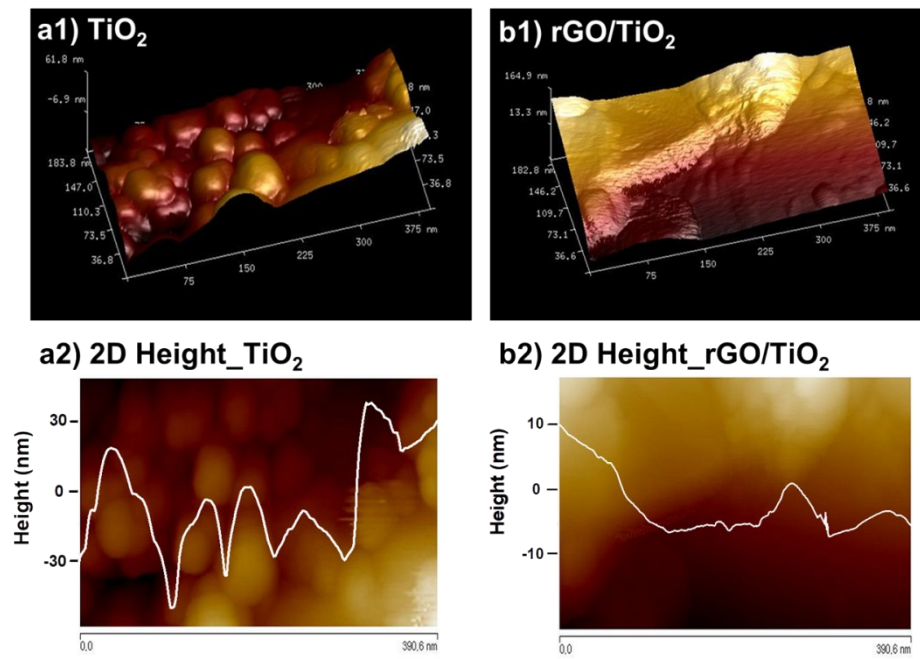

**Fig. S1** Tapping-mode AFM 3D-images (left) and the height cross-sectional profiles (right) of (a1-2) bare  $\text{TiO}_2$  and (b1-2)  $\text{rGO/TiO}_2$ .

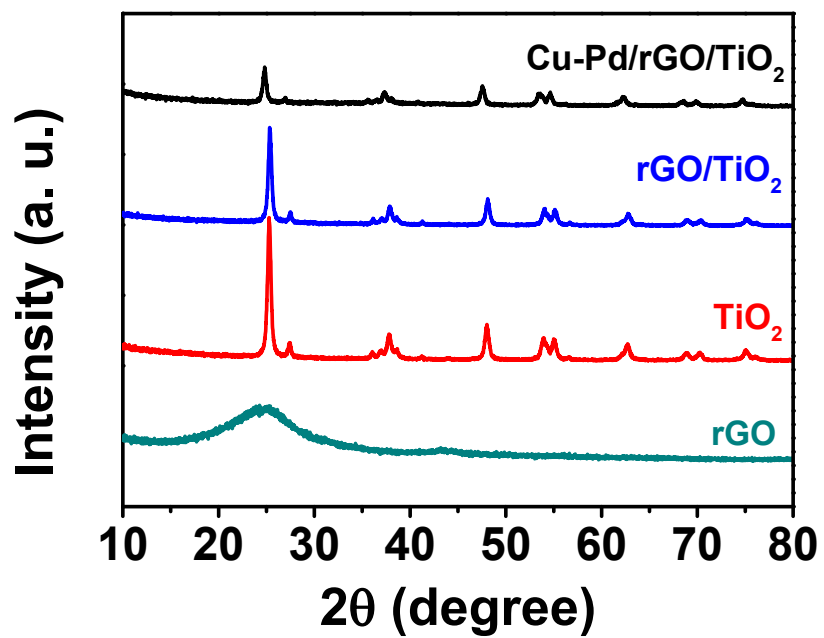

**Fig. S2** X-ray diffraction patterns (XRD) of rGO, bare TiO<sub>2</sub>, rGO/TiO<sub>2</sub> and Cu-Pd/rGO/TiO<sub>2</sub>.

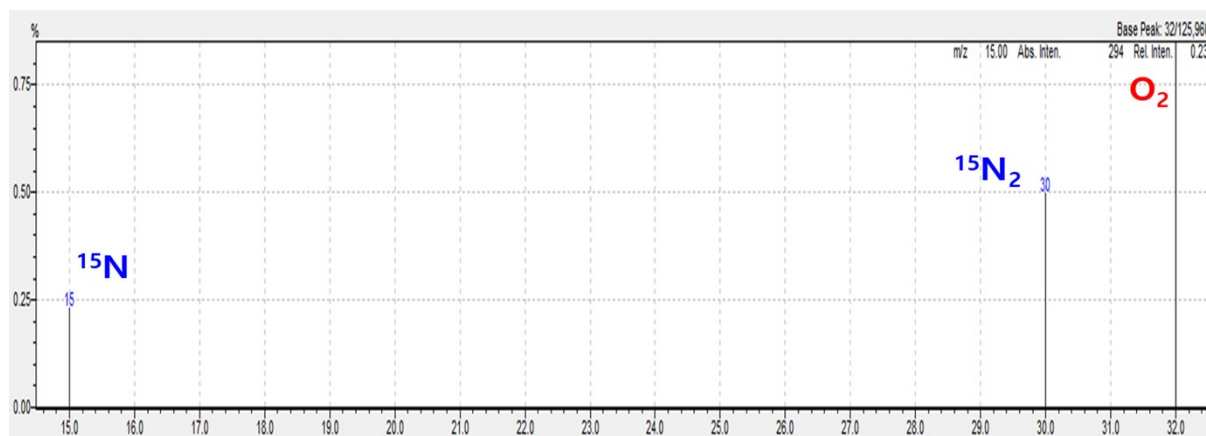

**Fig. S3** The gas chromatography-mass spectrometry (GC-MS) spectrum of the gas product generated from  $^{15}\text{NO}_3^-$  photoreduction on Cu-Pd/rGO/TiO<sub>2</sub>. Experimental conditions: [catalyst] = 1.5 g/L,  $[\text{NO}_3^-]_0 = 100 \mu\text{M}$ , the content of rGO, Cu, and Pd: 1 wt% each, pH = 5.3 (not adjusted), initially Ar-purged (de-aerated suspension) and  $\lambda > 320 \text{ nm}$  irradiation.

$^{15}\text{N}_2$  and  $\text{O}_2$  were generated as final gas products of the photoreaction and  $^{15}\text{N}$  was detected as a result of ionization of  $^{15}\text{N}_2$ .

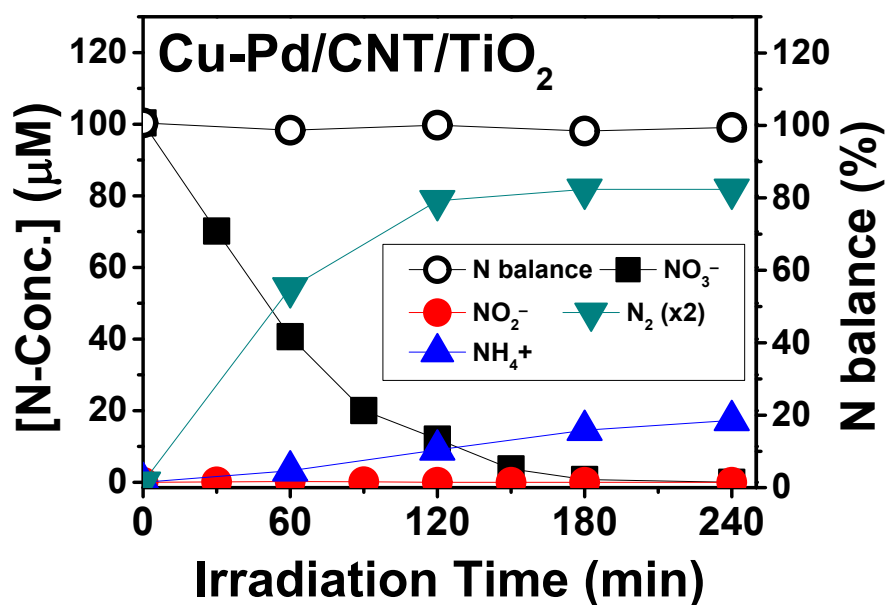

**Fig. S4** The time profiles of nitrate removal and N balance (%) along with the accompanying production of  $\text{NO}_2^-$ ,  $\text{NH}_4^+$ , and  $\text{N}_2$  gas in the headspace in the suspension of Cu-Pd/CNT/TiO<sub>2</sub>. The concentration of  $\text{N}_2$  dissolved in the solution should be negligibly small (< 2% of the  $\text{N}_2$  gas in the headspace, smaller than the experimental uncertainty of  $\text{N}_2$  gas amount) according to the Henry's law constant of  $\text{N}_2$  and was neglected in the N balance calculation. Experimental conditions: [catalyst] = 1.5 g/L, the content of CNT, Cu, and Pd: 1 wt% each,  $[\text{NO}_3^-]_0 = 100 \mu\text{M}$ , pH = 5.3-6.0 (not adjusted), initially Ar-purged (de-aerated suspension), and  $\lambda > 320 \text{ nm}$  irradiation.

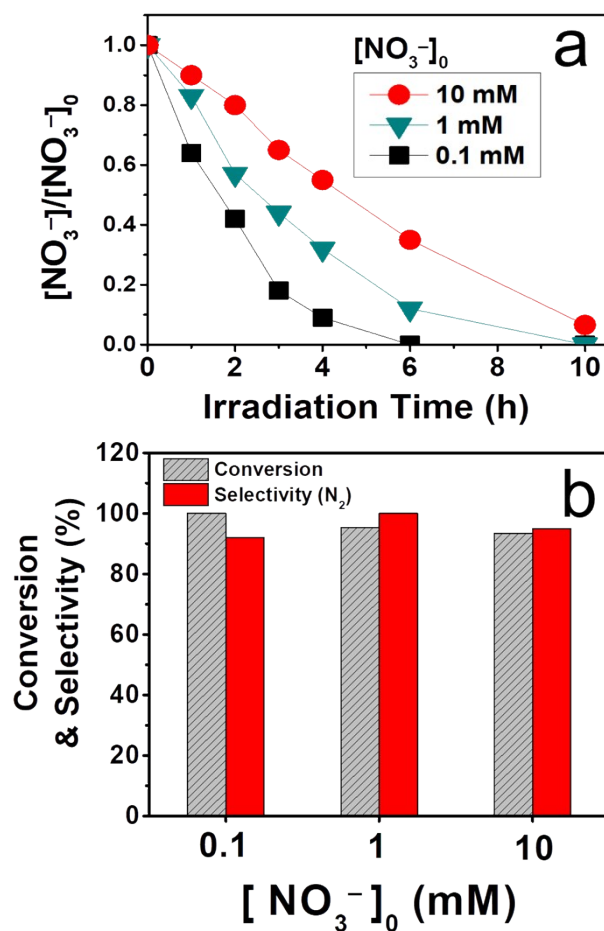

**Fig. S5** (a) The time profiles of photocatalytic removal of nitrate in the suspension of Cu-Pd/rGO/TiO<sub>2</sub> with different initial concentrations of nitrate. (b) The nitrate conversion and the selectivity to N<sub>2</sub> after 10 h photoreaction in Cu-Pd/rGO/TiO<sub>2</sub> suspension with different initial concentrations of nitrate. Experimental conditions were [catalyst] = 1.5 g/L, rGO content: 1 wt%, Cu content: 1 wt%, Pd content: 1 wt%, initially Ar-purged and  $\lambda > 320$  nm irradiation.

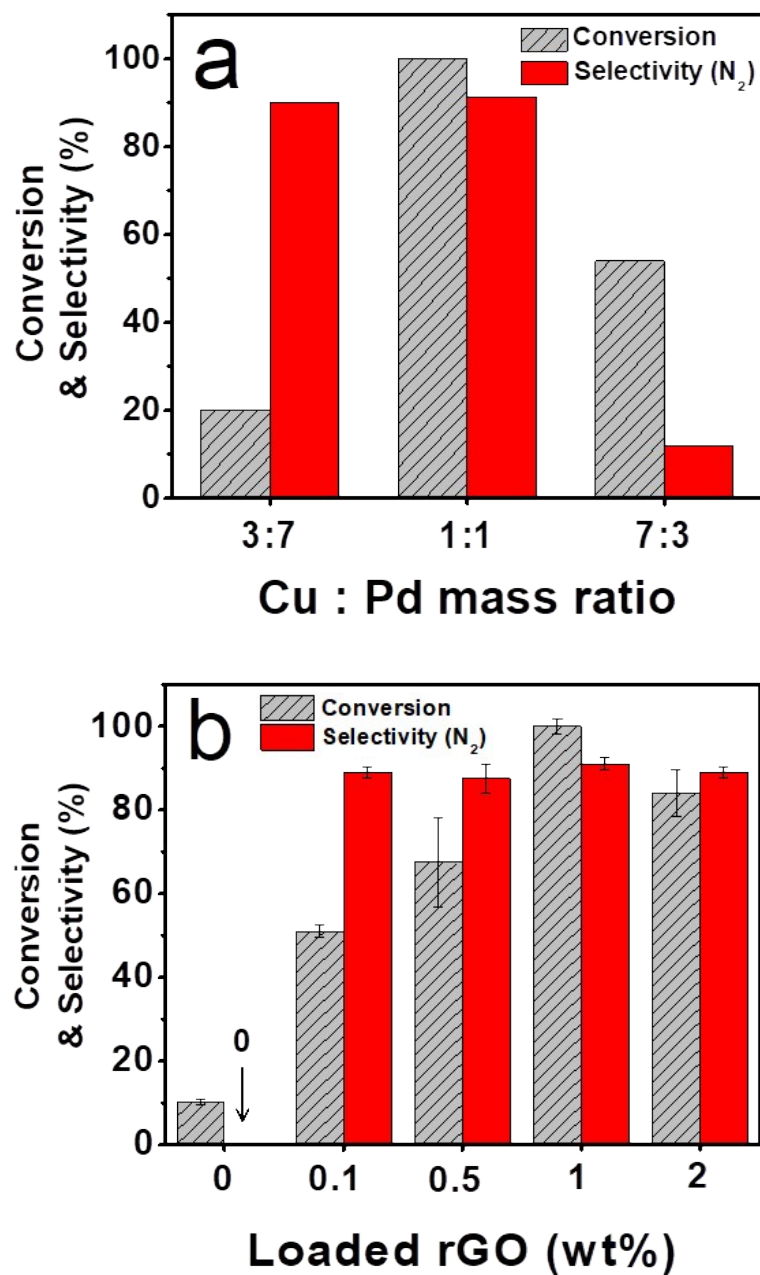

**Fig. S6** Photocatalytic nitrate conversion efficiency and the selectivity to N<sub>2</sub> with varying (a) the bimetal ratio and (b) the content of rGO. Experimental conditions: [catalyst] = 1.5 g/L, rGO content: 1 wt% for (a), Cu and Pd content: 1 wt% each for (b), [NO<sub>3</sub><sup>-</sup>]<sub>0</sub> = 100 μM, pH = 5.3-6.4 (not adjusted), initially Ar-purged (de-aerated suspension), and λ > 320 nm irradiation. The total weight percent of the loaded metals (Cu+Pd) was maintained at 2 wt% for (a).

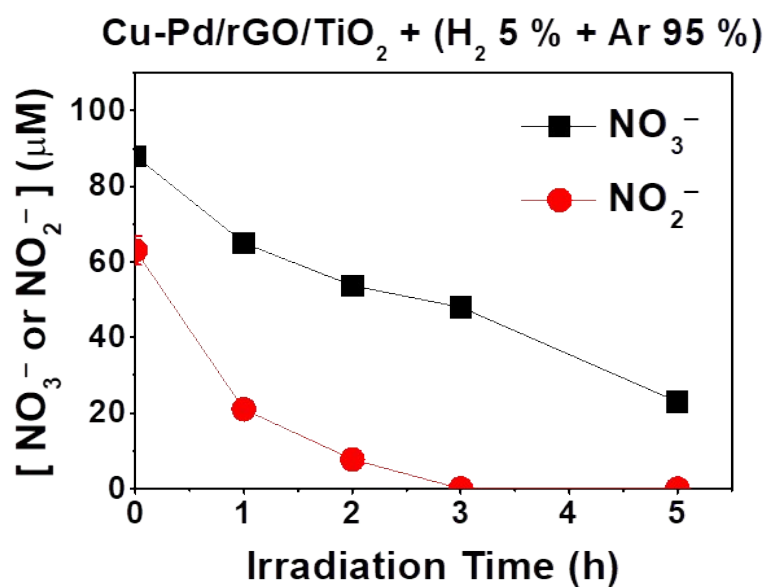

**Fig. S7** Time profiles of the removal of nitrate and nitrite on Cu-Pd/rGO/TiO<sub>2</sub> under dark condition. Experimental conditions: [catalyst] = 1.5 g/L, the content of rGO, Cu, and Pd: 1 wt% each, [NO<sub>3</sub><sup>-</sup>]<sub>0</sub> = [NO<sub>2</sub><sup>-</sup>]<sub>0</sub> = 100 μM, pH = 5.3-5.8 (not adjusted), continuously gas-purged.



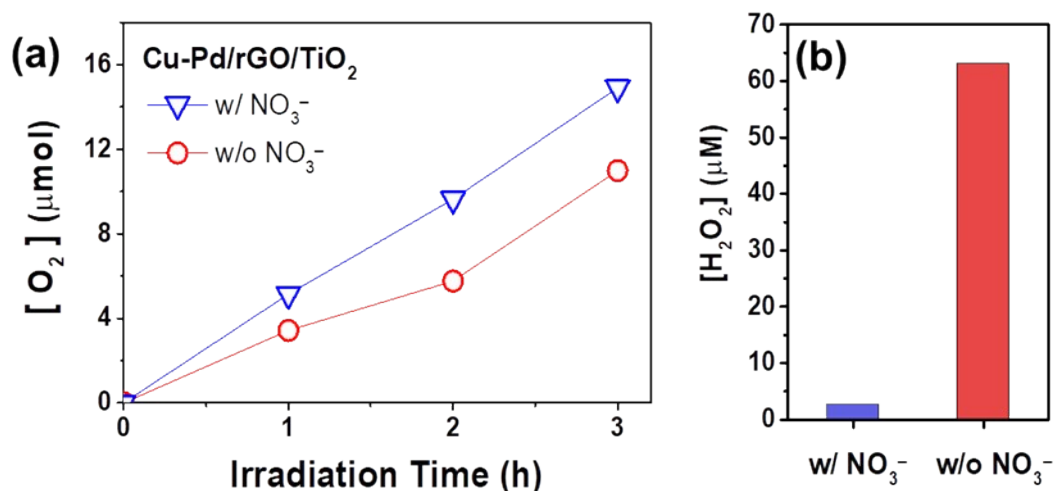

**Fig. S8** Photogeneration of (a)  $O_2$  and (b)  $H_2O_2$  on Cu-Pd/rGO/TiO<sub>2</sub> in the presence or absence of nitrate. Experimental conditions: [catalyst] = 1.5 g/L, the content of rGO, Cu, and Pd: 1 wt% each,  $[NO_3^-]_0 = 100 \mu\text{M}$ , pH = 5.3-6.0 (not adjusted), initially Ar-purged,  $\lambda > 320$  nm irradiation. The concentration of  $H_2O_2$  was estimated using DPD method.

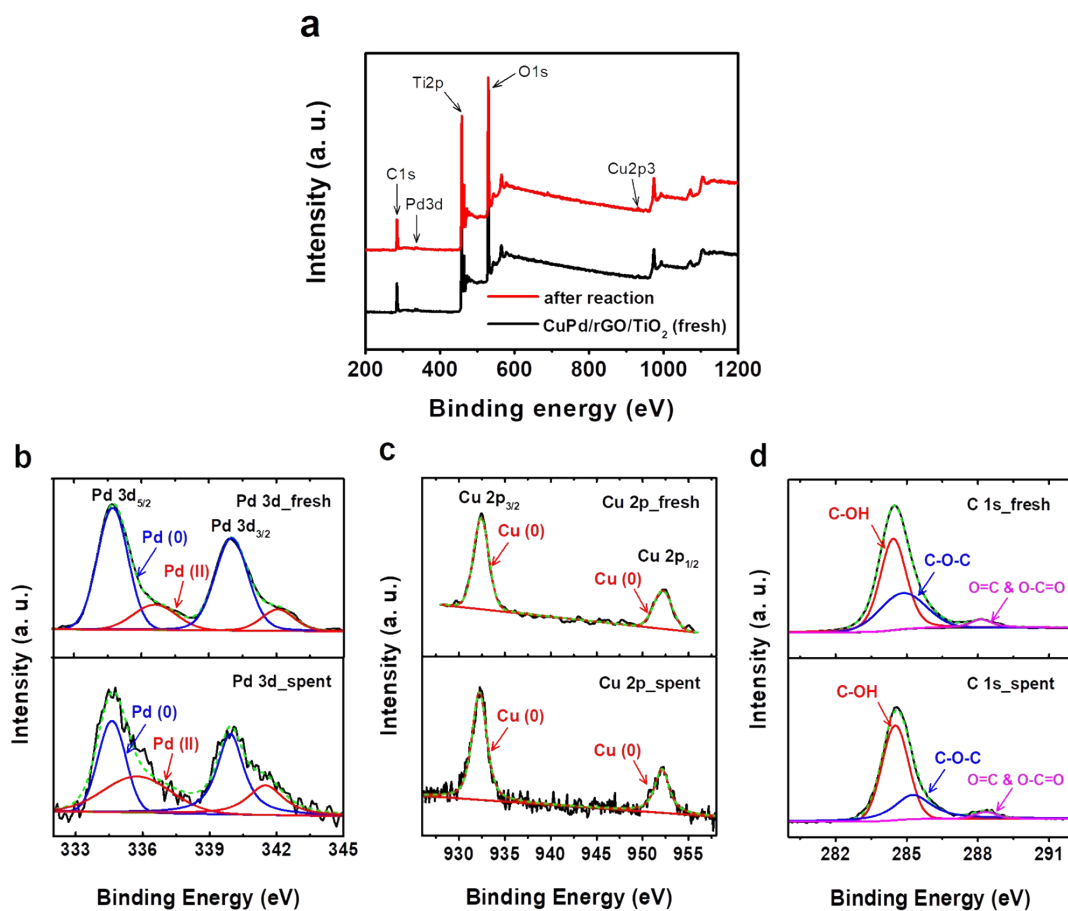

**Fig. S9** (a) The survey X-ray photoelectron spectra (XPS) for Cu-Pd/rGO/TiO<sub>2</sub> before and after 20 repeated photoreactions. XPS of (b) Pd 3d bands, (c) Cu 2p bands and (d) C 1s bands for Cu-Pd/rGO/TiO<sub>2</sub> comparing before and after 20 repeated photoreactions. Experimental conditions: [catalyst] = 1.5 g/L, [NO<sub>3</sub><sup>-</sup>]<sub>0</sub> = 10 mM, the content of rGO, Cu, and Pd: 1 wt% each, pH = 5.3-6.0 (not adjusted), initially Ar-purged (de-aerated suspension), and  $\lambda > 320$  nm irradiation.
